# Supplementary material for: Early interruption of exclusive breastfeeding: results from the eight-country MAL-ED study
Source: J Health Popul Nutr. 2015 May 1;34:10. doi: 10.1186/s41043-015-0004-2 (PMC5025973; doi:10.1186/s41043-015-0004-2)
Supplement: Additional file 1: — MAL-ED Network Investigators and Institutional Affiliations. [file 41043_2015_4_MOESM1_ESM.doc]

Additional file 1

**MAL-ED Network Investigators and Institutional Affiliations**

Maribel Paredes Olotegui1

Cesar Banda Chavez1

Dixner Rengifo Trigoso1

Julian Torres Flores1

Angel Orbe Vasquez1

Silvia Rengifo Pinedo1

Angel Mendez Acosta1

Imran Ahmed2

Didar Alam2

Syed Asad Ali2

Zulfiqar A Bhutta2

Sajad Memon2

Shahida Qureshi2

Muneera Rasheed2

Anita KM Zaidi2

Sajid Soofi2

Ali Turab2

Aisha K Yousafzai2

Ladaporn Bodhidatta3

Carl J Mason3

Sudhir Babji4

Anuradha Bose4

Sushil John4

Gagandeep Kang4

Beena Kurien4

Jayaprakash Muliyil4

Mohan Venkata Raghava4

Anup Ramachandran4

Anuradha Rose4

William Pan5,6

Ramya Ambikapathi6

Danny Carreon6

Vivek Charu6

Leyfou Dabo6

Viyada Doan6

Jhanelle Graham6

Christel Host6

Stacey Knobler6

Dennis Lang6

Benjamin McCormick6

Monica McGrath6

Mark Miller6

Archana Mohale6

Gaurvika Nayyar6

Stephanie Psaki6

Zeba Rasmussen6

Stephanie Richard6

Jessica Seidman6

Vivian Wang6

Rebecca Blank7

Michael Gottlieb7

Karen H Tountas7

Caroline Amour8

Estomih Mduma8

Buliga Mujaga Swema8

Tahmeed Ahmed9

AM Shamsir Ahmed9

Fahmida Tofail 9

Rashidul Haque9

Iqbal Hossain9

Munirul Islam9

Mustafa Mahfuz9

Dinesh Mondol 9

Ram Krishna Chandyo10

Prakash Sunder Shrestha10

Rita Shrestha10

Manjeswori Ulak10

Robert Black11

Laura Caulfield11

William Checkley11,6

Ping Chen11,6

Margaret Kosek11

Gwenyth Lee11

Pablo Peñataro Yori11

Laura Murray-Kolb12

Barbara Schaefer12,6

Cláudia Abreu13

Alexandre Bindá13

Hilda Costa13

Alessandra Di Moura13

Jose Quirino Filho13,6

Álvaro Leite13

Aldo Lima13

Noélia Lima13

Ila Lima13

Bruna Maciel13

Milena Moraes13

Francisco Mota13

Reinaldo Oriá13

Josiane Quetz13

Alberto Soares13

Erling Svensen14

Tor Strand 14

Crystal L Patil15

Pascal Bessong16

Cloupas Mahopo16

Angelina Mapula16

Cebisa Nesamvuni16

Emanuel Nyathi16

Amidou Samie16

Leah Barrett17

Jean Gratz17

Richard Guerrant17

Eric Houpt17

William Petri17

Rebecca Scharf17

Binob Shrestha18

Sanjaya Kumar Shrestha18

**Institutions**

1A.B. PRISMA, Iquitos, Peru

2Aga Khan University, Naushahro Feroze, Pakistan

3Armed Forces Research Institute of Medical Sciences, Bangkok, Thailand

4Christian Medical College, Vellore, India

5Duke University, Durham, NC, USA

6Fogarty International Center/National Institutes of Health, Bethesda, MD, USA

7Foundation for the NIH, Bethesda, MD, USA

8Haydom Lutheran Hospital, Haydom, Tanzania

9icddr,b, Dhaka, Bangladesh

10Institute of Medicine, Tribhuvan University, Kathmandu, Nepal

11Johns Hopkins University, Baltimore, MD, USA

12Pennsylvania State University, University Park, PA, USA

13Universidade Federal do Ceara, Fortaleza, Brazil

14University of Bergen, Norway; Haydom Lutheran Hospital, Haydom, Tanzania

15University of Illinois at Chicago, IL, USA

16University of Venda, Thohoyandou, South Africa

17University of Virginia, Charlottesville, VA, USA

18Walter Reed/AFRIMS Research Unit, Kathmandu, Nepal
